# Supplementary material
Source: PubMed Central journal article supplement (PMC4118592)
Supplement: NIHMS615216-supplement-01.pdf [file NIHMS615216-supplement-01.pdf]

1 Supporting Online Materials for

2  
3 Molecular Network Analysis of Endometriosis Reveals a  
4 Novel Role for c-Jun Regulated Macrophage Activation  
5

6  
7 Michael T. Beste, Nicole Pfäffle-Doyle, Emily A. Prentice, Douglas A. Lauffenburger,  
8 Keith B. Isaacson,\* and Linda G. Griffith\*  
9

10 \*To whom correspondence should be addressed. E-mail: [kisaacson@partners.org](mailto:kisaacson@partners.org)  
11 (K.B.I.) [griff@mit.edu](mailto:griff@mit.edu) (L.G.G.)  
12  
13  
14  
15

16 Materials and Methods

17 Figure S1. Sample size estimation and power calculations

18 Figure S2. Multiplex immunoassay performance

19 Figure S3. Non-negative matrix factorization of randomized and reduced data sets

20 Figure S4. Peritoneal aspirate characteristics across molecular subpopulations

21 Figure S5. Isolation and relative cytokine secretion of adherent peritoneal macrophages.

22 Figure S6. Differential cytokine secretion by peritoneal macrophages

23 Figure S7. Enrichment analysis of ASRM III/IV cytokines

24 Figure S8. Inferred co-expression of ASRM III/IV cytokines

25 Table S1. Pair-wise Wilcoxon rank-sum tests – Treatment Status

26 Table S2. Pair-wise Wilcoxon rank-sum tests – ASRM Staging

27 Table S3. Pair-wise Wilcoxon rank-sum tests – Cycle Phase

28 Table S4. Pair-wise Wilcoxon rank-sum tests – Recurrence Status

29 Table S5. Pair-wise Wilcoxon rank-sum tests – Lesion Distribution

30 Table S6. Pair-wise Wilcoxon rank-sum tests – Primary Indication

31 Table S7. Reported associations between peritoneal cytokines, chemokines, growth  
32 factors and pelvic endometriosis.

33 Table S8. Over-represented transcriptional binding sites among macrophage secreted  
34 cytokines

35 Table S9. Luminex Targets and Assay Performance Characteristics

36 Table S10. Leukocyte Sub-populations Among Peritoneal Aspirates

37 Table S11. Kinase Inhibitor Treatments  
38

## 38 Supplemental Materials and Methods

39

### 40 *Sample Size Calculations*

41

42 Sample size estimates were determined using previously reported effect sizes from case-control  
43 studies investigating peritoneal fluid cytokine associations with endometriosis. Twenty  
44 publications in which parametric statistical findings were reported indicated a broad range of  
45 effect sizes achieving significance ( $P < 0.05$ ). Shown in [Fig. S1](#), published effect sizes - reported  
46 as Standardized Mean Differences (SMD) following log-normalization - ranged between 0.54-  
47 4.32 with a median of 0.83. Statistical power for two-tailed Mann-Whitney U-tests tests of  
48 association between cytokine concentrations and clinical variables was calculated using  
49 G\*Power3. Maintaining a 2:1 case:control allocation ratio, approximately 60 samples are  
50 required to obtain 0.8 power for moderate effect sizes corresponding to SMD = 0.8.

51

52

### 53 *Gene Set Enrichment Analysis*

54

55 Gene set enrichment analysis was performed as originally described ([Subramanian 2005](#)) using  
56 gene profiles derived from the Immune Response in silico (IRIS) expression compendia and  
57 Human Immune Cell Transcriptome (GEO Accession GSE22886 and GSE3982, respectively)  
58 ([Abbas 2005](#), [Jeffrey 2006](#)).

59

60 For all analyses, 22,283 U133A probe sets were first mapped to 14,339 unique genes and  
61 expressed sequence tags by taking the maximum intensity value across all probes. Expression  
62 values for all genes were then median-centered across all profiles in the compendia, and  
63 enrichment scores for each profile calculated using a weighting exponent of one. Finally,  
64 empirical  $P$  values for each enrichment score were determined by generating null distributions  
65 of scores from 1000 random cytokine signatures of equivalent size selected from the 47  
66 detected cytokines or 79 corresponding receptors.

67

68

### 69 *Pair-wise Enrichment and Reconstruction of Hierarchical Immune Cell Networks*

70

71 To quantify the degree to which a set of differentially regulated cytokines contribute to specific  
72 routes of intercellular communication, we introduce a pair-wise enrichment statistic that captures  
73 the coordinate expression of signature cytokines by secreting cell populations and their cognate  
74 receptors by responding cell populations. Specifically, we define the pair-wise enrichment score,  
75  $ES_{ij}$  between secreting population  $i$  and responding population  $j$  as a two-dimensional  
76 generalization of the Kolmogorov-Smirnov statistic ([Ni 2012](#)):

77

78

$$ES_{ij} = \max |F(x_i, y_j) - G(x_0, y_0)|$$

79

80 where  $F(x_i, y_j)$  is the two-dimensional empirical cumulative distribution function (ECDF) for  
81 signature cytokine and receptor expression levels,  $x_i$  and  $y_j$ , respectively, and  $G(x_0, y_0)$  is the  
82 reference ECDF for all extracellular gene products and their receptors across all lineages. The  
83 reference distribution may be constructed explicitly or approximated; here we use the median  
84 cytokine and receptor expression levels of the forty-seven assayed proteins across all cell  
85 lineages to approximate  $G(x_0, y_0)$ .

86

87 For  $n$  distinct cell lineages, the 2D-KS enrichment score  $ES_{ij}$  is calculated over all  $n^2$  possible  
88 pairwise combinations of secreting and responding populations. Null distributions of  $ES_{ij}$  for

89 each  $n^2$  interactions are similarly constructed from randomly generated cytokine/receptor  
90 signatures to obtain the corresponding significance levels. Finally, we rearrange the edge-  
91 directed network of significant ( $P < 0.05$ ) interactions according to decreasing out-degree to  
92 evaluate the hierarchy of cell-cell interactions.  
93

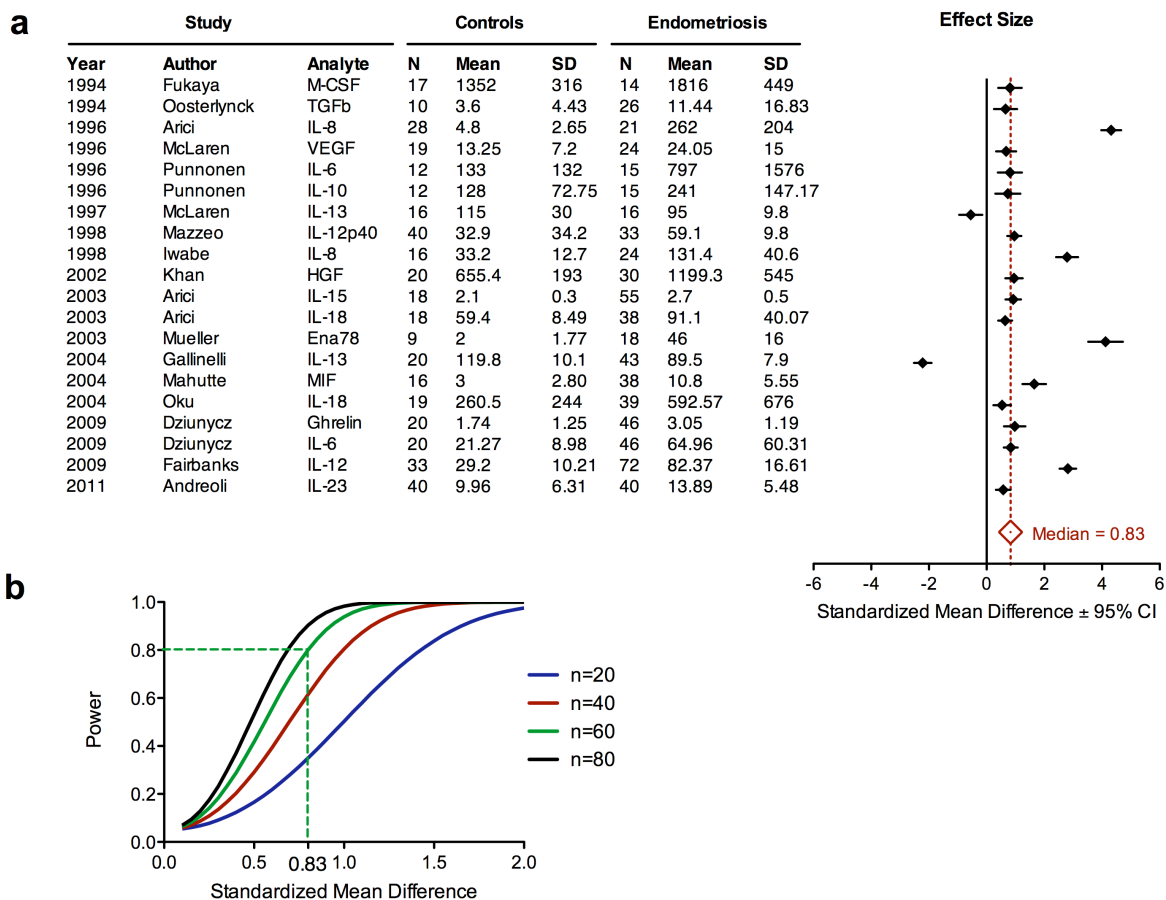

93  
 94 **Figure S1. Sample size estimation and power calculations.** (a) Published associations  
 95 between peritoneal fluid cytokines and endometriosis were evaluated to estimate the range of  
 96 anticipated effect sizes. Standardized mean differences  $\pm$  95% confidence intervals are shown  
 97 to the right (Range = 0.54-4.32; Median = 0.83). (b) Power curves for two-tailed Mann-Whitney  
 98 U-tests determined at the  $\alpha=0.05$  significance level for the indicated effect sizes and total  
 99 sample size, assuming a 2:1 case:control allocation.  
 100

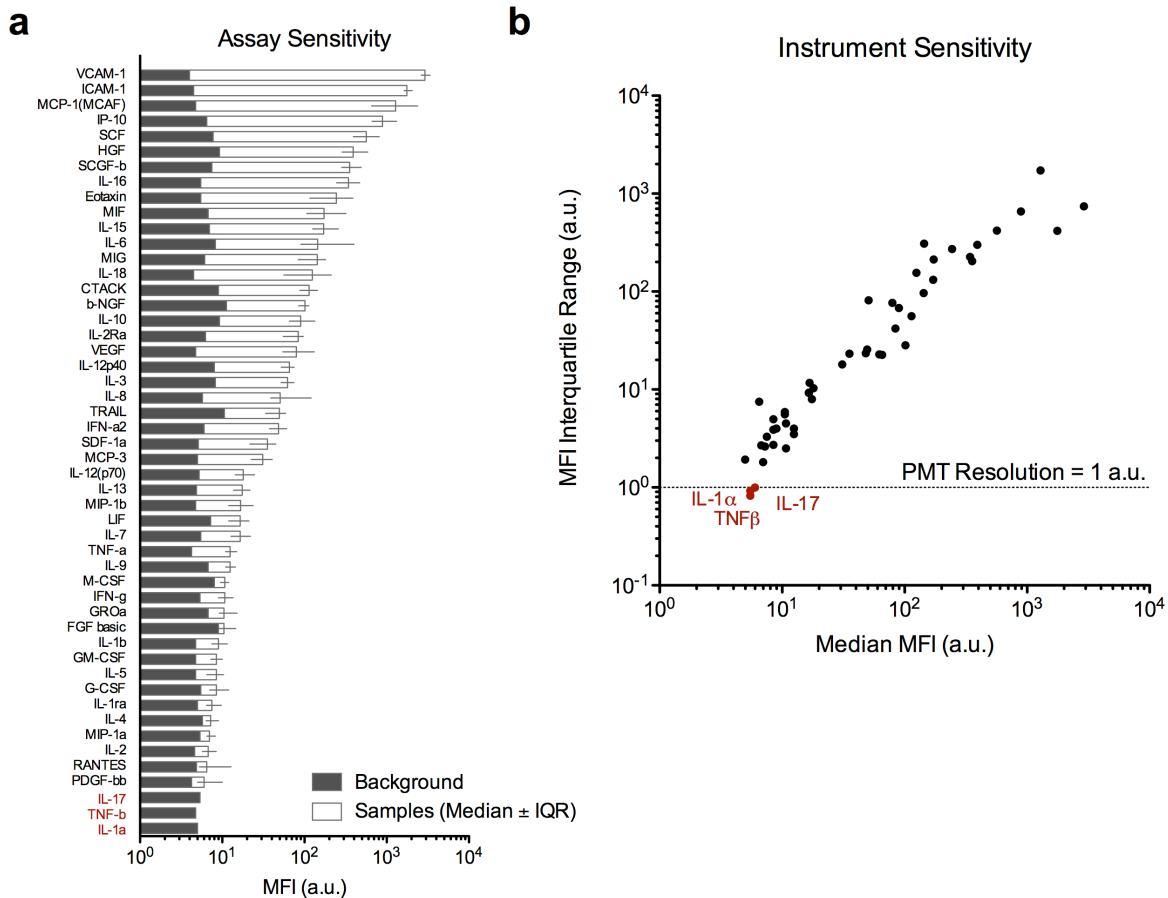

100  
101  
102  
103  
104  
105  
106  
107

**Figure S2. Multiplex immunoassay performance**

Prior to analysis, raw fluorescent intensities were evaluated for relative variation above background levels (a) and total sample variation above instrument resolution (b). In (a), bars represent median  $\pm$  interquartile range. A majority of concentrations for three peritoneal analytes (IL-1 $\alpha$ , TNF $\beta$ , and IL-17) fall below the lower detection limits for the immunoassay.

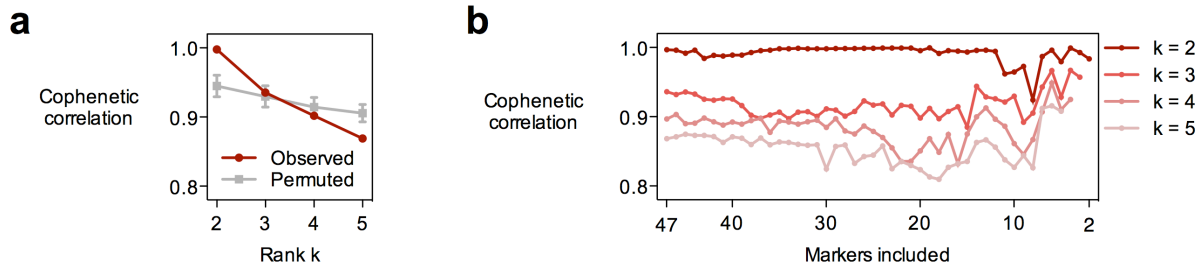

107  
 108  
 109  
 110  
 111  
 112  
 113

**Figure S3. Non-negative matrix factorization of randomized and reduced data sets**

(a) Cophenetic correlation of 1000 rank  $k$  factorizations in the observed (red) and permuted (shaded) data sets. Error bars indicate 95% confidence intervals. (b) Optimal factorization into two subsets is conserved across reduced data sets comprising markers exhibiting maximal variation.

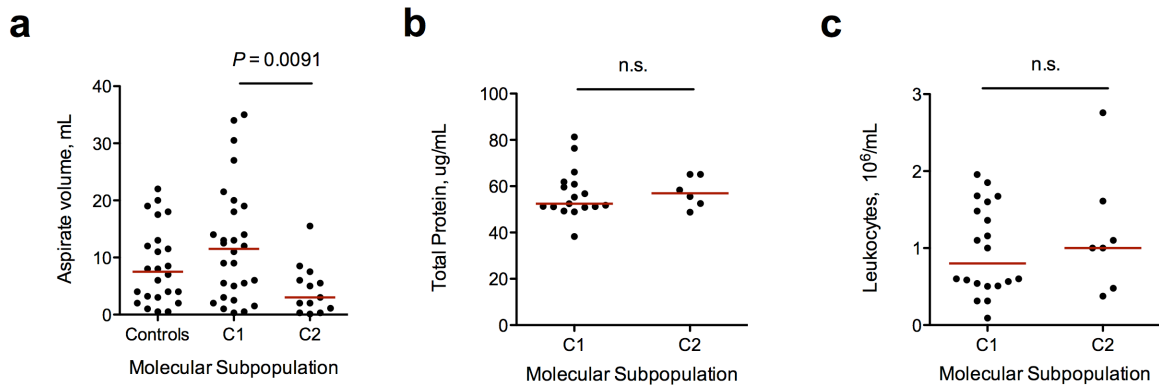

113  
 114  
 115  
 116  
 117  
 118

**Figure S4. Peritoneal aspirate characteristics across molecular subpopulations**  
 Patient subpopulations defined by low (C1) and elevated (C2) peritoneal fluid cytokine concentrations show markedly reduced median aspirate volumes (a), but equivalent total protein and leukocyte levels (b and c).

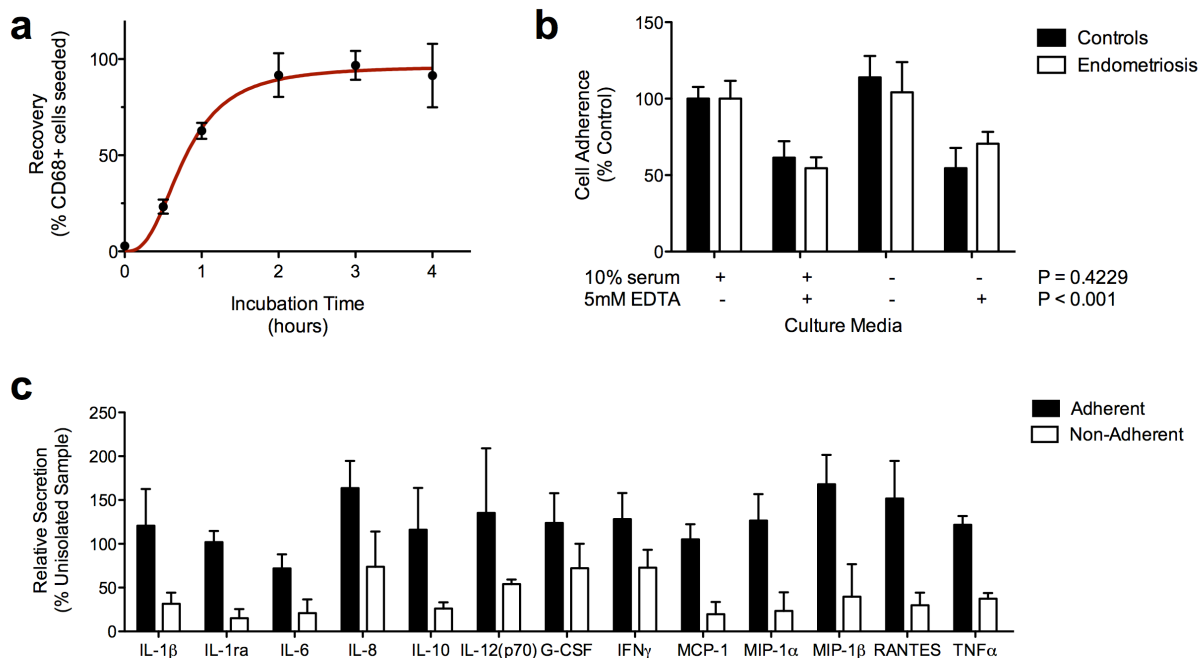

118  
 119 **Figure S5. Isolation and relative cytokine secretion of adherent peritoneal macrophages.**  
 120 (A) Recovery of adherent CD68+ macrophages as a function of static incubation period with  
 121 tissue culture treated polystyrene plates. (B) After two hours of incubation, macrophage  
 122 adherence is sensitive to the presence of divalent cations, but not substrate deposition of serum  
 123 components among both control and endometriosis samples. P values indicate significance by  
 124 two-way ANOVA. (C) Cytokine secretion among adherent and non-adherent peritoneal  
 125 leukocytes (relative to unisolated, sample-matched controls). For all panels, data are mean  $\pm$   
 126 s.e.m. of three donor samples.



**a**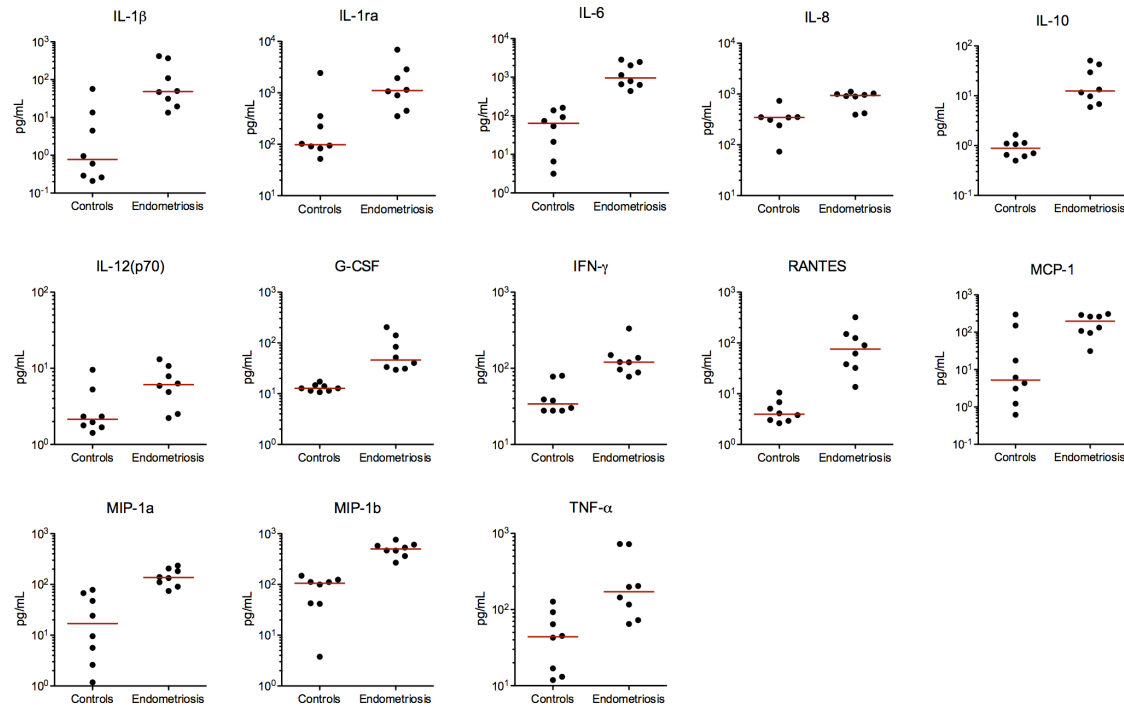**b**

| Cytokine   | Rank-sum | P-value | Fold Change |
|------------|----------|---------|-------------|
| IL-1β      | 0.0047   |         | 62.5        |
| IL-1ra     | 0.0086   |         | 11.28       |
| IL-6       | 0.0002   |         | 15.1        |
| IL-8       | 0.0012   |         | 2.71        |
| IL-10      | 0.0002   |         | 14.13       |
| IL-12(p70) | 0.0312   |         | 2.85        |
| G-CSF      | 0.0009   |         | 3.62        |
| IFN-γ      | 0.0016   |         | 3.54        |
| MCP-1      | 0.0281   |         | 37.7        |
| MIP-1α     | 0.0003   |         | 8.09        |
| MIP-1β     | 0.0002   |         | 4.73        |
| RANTES     | 0.0002   |         | 19.2        |
| TNF-α      | 0.0003   |         | 3.90        |

127  
 128  
 129  
 130  
 131

**Figure S6. Differential cytokine secretion by peritoneal macrophages**

(a) Thirteen of fifty cytokines assayed in media conditioned by isolated peritoneal macrophages demonstrated significant increases (Wilcoxon rank sum test  $P < 0.05$  and minimum two-fold change) in endometriosis samples versus controls. (b) Statistical summary for differentially secreted cytokines in (a).

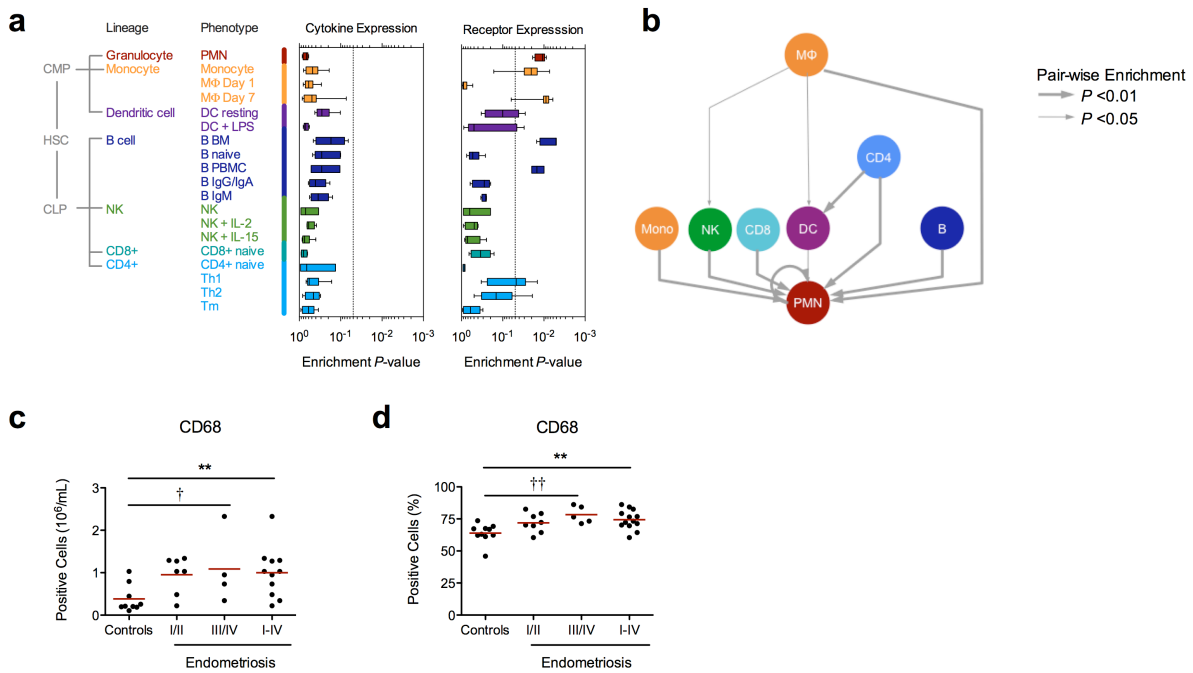

132  
 133  
 134  
 135  
 136  
 137  
 138  
 139  
 140  
 141  
 142

**Figure S7. Enrichment analysis of ASRM III/IV cytokines**

(A) Significance of lineage-specific enrichment scores for ASRM III/IV cytokine expression obtained by GSEA among Immune Response *in silico* (IRIS) transcriptional profiles. (B) Hierarchy of enriched intercellular cytokine-receptor interactions. Flow cytometric confirmation of increased (C) absolute and (D) relative CD68+ macrophage abundance among endometriosis patient populations. Increasing CD68+ counts among patient subpopulations grouped by ASRM stage are shown for comparison.  $**P < 0.01$  Wilcoxon rank-sum test;  $†P < 0.05$ ,  $††P < 0.01$ , linear trend test.

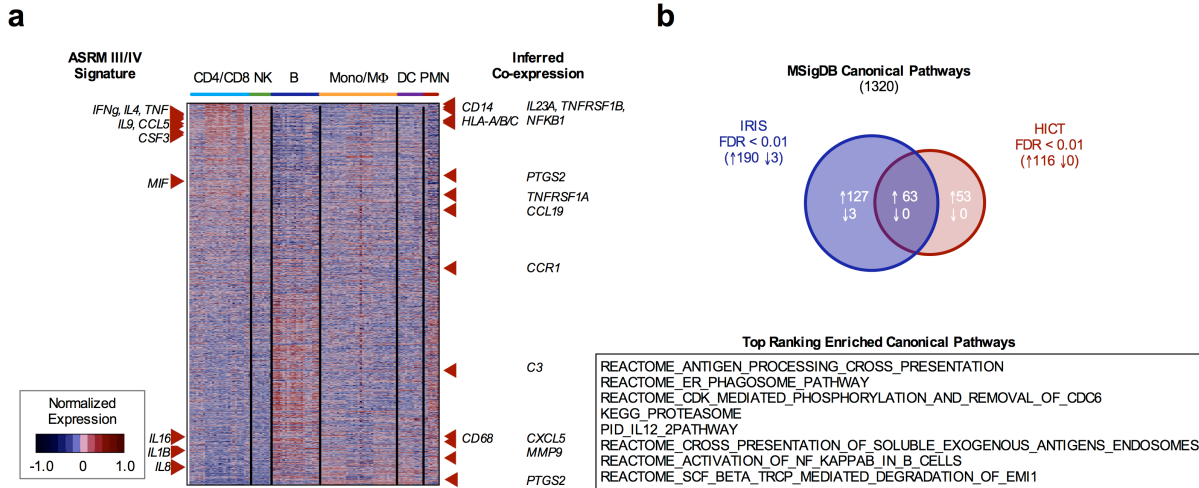

142  
143  
144  
145  
146  
147  
148  
149  
150  
151

**Figure S8. Inferred co-expression of ASRM III/IV cytokines**

(A) Transcripts from the IRIS compendia rank-ordered according to median correlation distance to cytokines differentially associated with ASRM stage III/IV endometriosis (left). In contrast to co-expression analysis using the multivariate consensus signature, inferred co-expression of macrophage surface markers and reported disease markers were broad and incoherent (right).

(B) Gene set enrichment of IRIS and HICT co-expression profiles derived from the ASRM III/IV signature cytokines likewise demonstrate incoherent enrichment of unrelated canonical pathways.

152 **Table S1.** Pair-wise Wilcoxon rank-sum tests – Treatment Status  
 153

| Cytokine   | Median Concentration (pg/mL) |           |         | Untreated vs. Controls |               | Treated vs. Controls |        | Treated vs. Untreated |         |
|------------|------------------------------|-----------|---------|------------------------|---------------|----------------------|--------|-----------------------|---------|
|            | Controls                     | Untreated | Treated | Unadjusted             | BH            | Unadjusted           | BH     | Unadjusted            | BH      |
| PDGF-bb    | 2.50                         | 2.50      | 2.35    | 0.5274                 | 0.1148        | 0.9617               | 0.9414 | 0.4870                | 0.45478 |
| IL-1b      | 0.23                         | 0.26      | 0.24    | 0.0131                 | <b>0.0307</b> | 0.3586               | 0.8719 | 0.1906                | 0.39612 |
| IP-10      | 667.11                       | 707.89    | 826.82  | 0.5908                 | 0.1153        | 0.8113               | 0.9006 | 0.8870                | 0.59928 |
| IL-1ra     | 12.27                        | 13.06     | 11.30   | 0.3851                 | 0.1081        | 0.4163               | 0.8719 | 0.1309                | 0.39230 |
| IL-2       | 0.15                         | 0.15      | 0.13    | 0.6834                 | 0.1153        | 0.6782               | 0.9006 | 0.4498                | 0.44631 |
| IL-4       | 0.32                         | 0.35      | 0.33    | 0.0193                 | <b>0.0307</b> | 0.3069               | 0.8719 | 0.2548                | 0.39612 |
| IL-5       | 0.52                         | 0.52      | 0.56    | 0.7176                 | 0.1162        | 0.0939               | 0.8719 | 0.1301                | 0.39230 |
| IL-6       | 10.22                        | 10.97     | 10.70   | 0.5039                 | 0.1132        | 0.6906               | 0.9006 | 0.3651                | 0.44351 |
| IL-7       | 4.93                         | 5.06      | 5.19    | 0.4655                 | 0.1081        | 0.4445               | 0.8719 | 0.8730                | 0.59928 |
| IL-8       | 2.72                         | 3.48      | 3.29    | 0.0221                 | <b>0.0307</b> | 0.1150               | 0.8719 | 0.4190                | 0.44351 |
| IL-9       | 2.81                         | 3.27      | 2.94    | 0.0068                 | <b>0.0307</b> | 0.6437               | 0.9006 | 0.0929                | 0.39230 |
| IL-10      | 2.08                         | 2.23      | 2.32    | 0.4608                 | 0.1081        | 0.3988               | 0.8719 | 0.8660                | 0.59928 |
| IL-12(p70) | 2.45                         | 2.66      | 2.79    | 0.4154                 | 0.1081        | 0.4353               | 0.8719 | 0.8870                | 0.59928 |
| IL-13      | 0.64                         | 0.72      | 0.71    | 0.2187                 | 0.0881        | 0.3310               | 0.8719 | 0.8800                | 0.59928 |
| IL-15      | 1.26                         | 1.32      | 1.35    | 0.7470                 | 0.1162        | 0.6906               | 0.9006 | 0.8381                | 0.59928 |
| IL-17      | 0.70                         | 0.76      | 0.68    | 0.0192                 | 0.0307        | 0.7236               | 0.9006 | 0.1467                | 0.39230 |
| Eotaxin    | 70.03                        | 89.44     | 109.51  | 0.3606                 | 0.1081        | 0.1474               | 0.8719 | 0.3842                | 0.44351 |
| FGFb       | 0.90                         | 0.94      | 0.90    | 0.1115                 | 0.0777        | 0.8483               | 0.9006 | 0.1308                | 0.39230 |
| G-CSF      | 1.69                         | 2.03      | 1.76    | 0.0284                 | <b>0.0330</b> | 0.8234               | 0.9006 | 0.1451                | 0.39230 |
| GM-CSF     | 0.10                         | 0.10      | 0.08    | 0.4457                 | 0.1081        | 0.8232               | 0.9006 | 0.2850                | 0.41140 |
| IFN-g      | 23.77                        | 27.51     | 26.04   | 0.0576                 | 0.0573        | 0.3724               | 0.8719 | 0.2481                | 0.39612 |
| MCP-1      | 44.98                        | 64.62     | 43.12   | 0.1465                 | 0.0850        | 0.8361               | 0.9006 | 0.1453                | 0.39230 |
| MIP-1a     | 0.85                         | 0.89      | 0.91    | 0.1653                 | 0.0881        | 0.4349               | 0.8719 | 0.7351                | 0.59853 |
| MIP-1b     | 1.23                         | 1.20      | 1.25    | 0.6895                 | 0.1153        | 0.5450               | 0.9006 | 0.3650                | 0.44351 |
| RANTES     | 2.34                         | 2.66      | 2.56    | 0.1442                 | 0.0850        | 0.3809               | 0.8719 | 0.5940                | 0.52393 |
| TNF-a      | 3.80                         | 4.20      | 3.97    | 0.0709                 | 0.0617        | 0.7741               | 0.9006 | 0.1451                | 0.39230 |
| VEGF       | 15.93                        | 17.27     | 16.65   | 0.4288                 | 0.1081        | 0.4168               | 0.8719 | 0.8870                | 0.59928 |
| CTACK      | 104.86                       | 94.18     | 82.78   | 0.2278                 | 0.0881        | 0.1388               | 0.8719 | 0.4665                | 0.44889 |
| GROa       | 3.73                         | 3.73      | 3.45    | 0.7997                 | 0.1185        | 0.3985               | 0.8719 | 0.1309                | 0.39230 |
| ICAM-1     | 828.72                       | 831.64    | 827.01  | 0.3447                 | 0.1081        | 0.9113               | 0.9325 | 0.4039                | 0.44351 |
| IL-1a      | 0.13                         | 0.12      | 0.13    | 0.7505                 | 0.1162        | 0.4978               | 0.9006 | 0.2620                | 0.39612 |
| IL-2Ra     | 49.19                        | 45.35     | 46.20   | 0.2248                 | 0.0881        | 0.6444               | 0.9006 | 0.1606                | 0.39230 |
| IL-3       | 71.01                        | 69.32     | 64.54   | 0.6783                 | 0.1153        | 0.6558               | 0.9006 | 0.3604                | 0.44351 |
| IL-12p40   | 216.90                       | 219.76    | 189.39  | 0.8718                 | 0.1248        | 0.2086               | 0.8719 | 0.2411                | 0.39612 |
| IL-16      | 185.68                       | 188.22    | 189.44  | 0.4655                 | 0.1081        | 0.7989               | 0.9006 | 0.6316                | 0.54202 |
| IL-18      | 6.08                         | 5.22      | 4.04    | 0.8900                 | 0.1248        | 0.8610               | 0.9006 | 0.9575                | 0.63342 |
| LIF        | 1.92                         | 1.82      | 1.98    | 0.6782                 | 0.1153        | 0.7866               | 0.9006 | 1.0000                | 0.63507 |
| MCP-3      | 16.09                        | 17.08     | 13.39   | 0.2218                 | 0.0881        | 0.6907               | 0.9006 | 0.1357                | 0.39230 |
| M-CSF      | 0.33                         | 0.32      | 0.33    | 0.8959                 | 0.1248        | 1.0000               | 0.9414 | 0.9929                | 0.63507 |
| MIF        | 75.35                        | 96.61     | 88.26   | 0.0825                 | 0.0639        | 0.3477               | 0.8719 | 0.4140                | 0.44351 |
| MIG        | 452.94                       | 436.38    | 469.03  | 0.6176                 | 0.1153        | 0.2790               | 0.8719 | 0.4451                | 0.44631 |
| b-NGF      | 7.32                         | 7.38      | 6.47    | 0.6448                 | 0.1153        | 0.2517               | 0.8719 | 0.2010                | 0.39612 |
| SCF        | 82.52                        | 71.04     | 94.45   | 0.3069                 | 0.1081        | 0.4937               | 0.9006 | 0.1606                | 0.39230 |
| SCGF       | 1261.96                      | 1216.32   | 1118.20 | 0.3770                 | 0.1081        | 0.9619               | 0.9414 | 0.5578                | 0.50608 |
| SDF-1a     | 49.09                        | 51.09     | 51.82   | 0.6067                 | 0.1153        | 1.0000               | 0.9414 | 0.7091                | 0.59258 |
| TNFb       | 0.32                         | 0.32      | 0.32    | 0.4115                 | 0.1081        | 0.5954               | 0.9006 | 0.2393                | 0.39612 |
| TRAIL      | 32.60                        | 31.65     | 23.94   | 0.6952                 | 0.1153        | 0.0370               | 0.8719 | 0.1887                | 0.39612 |
| VCAM-1     | 1156.08                      | 1212.30   | 1068.50 | 0.7762                 | 0.1175        | 0.1151               | 0.8719 | 0.1061                | 0.39230 |
| HGF        | 331.54                       | 342.44    | 359.96  | 0.1942                 | 0.0881        | 0.3642               | 0.8719 | 0.8382                | 0.59928 |
| IFNa2      | 17.43                        | 16.94     | 16.24   | 0.6783                 | 0.1153        | 0.2386               | 0.8719 | 0.3420                | 0.44351 |

154  
 155

155 **Table S2.** Pair-wise Wilcoxon rank-sum tests – ASRM Staging  
 156

| Cytokine   | Median Concentration (pg/mL) |              |                 | ASRM I/II vs. Controls |        | ASRM III/IV vs. Controls |               | ASRM III/IV vs. I/II |        |
|------------|------------------------------|--------------|-----------------|------------------------|--------|--------------------------|---------------|----------------------|--------|
|            | Controls                     | Minimal/Mild | Moderate/Severe | Unadjusted             | BH     | Unadjusted               | BH            | Unadjusted           | BH     |
| PDGF-bb    | 2.50                         | 2.32         | 3.03            | 0.5566                 | 0.9805 | 0.0550                   | 0.0744        | 0.0190               | 0.0531 |
| IL-1b      | 0.23                         | 0.24         | 0.30            | 0.3395                 | 0.9805 | 0.0004                   | <b>0.0032</b> | 0.0095               | 0.0478 |
| IP-10      | 667.11                       | 707.89       | 707.97          | 0.6700                 | 0.9805 | 0.6192                   | 0.2534        | 0.9476               | 0.4864 |
| IL-1ra     | 12.27                        | 12.27        | 13.86           | 0.9708                 | 0.9805 | 0.0870                   | 0.0777        | 0.0502               | 0.1147 |
| IL-2       | 0.15                         | 0.14         | 0.16            | 0.9805                 | 0.9805 | 0.4640                   | 0.2149        | 0.4776               | 0.3475 |
| IL-4       | 0.32                         | 0.34         | 0.48            | 0.5575                 | 0.9805 | 0.0002                   | <b>0.0032</b> | 0.0017               | 0.0416 |
| IL-5       | 0.52                         | 0.50         | 0.55            | 0.9708                 | 0.9805 | 0.5290                   | 0.2315        | 0.4852               | 0.3475 |
| IL-6       | 10.22                        | 9.60         | 28.06           | 0.6878                 | 0.9805 | 0.0769                   | 0.0777        | 0.0345               | 0.0866 |
| IL-7       | 4.93                         | 4.98         | 5.45            | 0.6005                 | 0.9805 | 0.4559                   | 0.2149        | 0.6742               | 0.4095 |
| IL-8       | 2.72                         | 3.10         | 10.56           | 0.3941                 | 0.9805 | 0.0009                   | <b>0.0032</b> | 0.0181               | 0.0531 |
| IL-9       | 2.81                         | 3.11         | 3.61            | 0.0299                 | 0.9805 | 0.0113                   | <b>0.0260</b> | 0.3712               | 0.2977 |
| IL-10      | 2.08                         | 1.95         | 2.48            | 0.8170                 | 0.9805 | 0.0899                   | 0.0777        | 0.0902               | 0.1417 |
| IL-12(p70) | 2.45                         | 2.45         | 2.97            | 0.9224                 | 0.9805 | 0.0927                   | 0.0777        | 0.0621               | 0.1274 |
| IL-13      | 0.64                         | 0.67         | 0.73            | 0.5504                 | 0.9805 | 0.1073                   | 0.0859        | 0.1675               | 0.1832 |
| IL-15      | 1.26                         | 1.45         | 1.28            | 0.4801                 | 0.9805 | 0.8264                   | 0.3030        | 0.7826               | 0.4374 |
| IL-17      | 0.70                         | 0.76         | 0.78            | 0.1098                 | 0.9805 | 0.0118                   | 0.0260        | 0.2108               | 0.2097 |
| Eotaxin    | 70.03                        | 88.90        | 92.30           | 0.5507                 | 0.9805 | 0.3131                   | 0.1604        | 0.6085               | 0.3825 |
| FGFb       | 0.90                         | 0.94         | 0.97            | 0.2778                 | 0.9805 | 0.0870                   | 0.0777        | 0.5025               | 0.3475 |
| G-CSF      | 1.69                         | 1.86         | 2.90            | 0.5180                 | 0.9805 | 0.0007                   | <b>0.0032</b> | 0.0065               | 0.0478 |
| GM-CSF     | 0.10                         | 0.10         | 0.10            | 0.7142                 | 0.9805 | 0.3190                   | 0.1604        | 0.5617               | 0.3622 |
| IFN-g      | 23.77                        | 24.10        | 32.65           | 0.8264                 | 0.9805 | 0.0009                   | <b>0.0032</b> | 0.0086               | 0.0478 |
| MCP-1      | 44.98                        | 64.62        | 86.72           | 0.2894                 | 0.9805 | 0.1398                   | 0.1026        | 0.3647               | 0.2977 |
| MIP-1a     | 0.85                         | 0.89         | 0.92            | 0.4860                 | 0.9805 | 0.0737                   | 0.0777        | 0.2563               | 0.2242 |
| MIP-1b     | 1.23                         | 1.09         | 1.28            | 0.2838                 | 0.9805 | 0.6087                   | 0.2534        | 0.2585               | 0.2242 |
| RANTES     | 2.34                         | 2.34         | 4.81            | 0.9126                 | 0.9805 | 0.0034                   | <b>0.0101</b> | 0.0035               | 0.0445 |
| TNF-a      | 3.80                         | 4.06         | 4.59            | 0.3297                 | 0.9805 | 0.0242                   | <b>0.0426</b> | 0.2168               | 0.2097 |
| VEGF       | 15.93                        | 16.06        | 17.52           | 0.7608                 | 0.9805 | 0.2603                   | 0.1432        | 0.4306               | 0.3282 |
| CTACK      | 104.86                       | 95.20        | 91.00           | 0.6879                 | 0.9805 | 0.0722                   | 0.0777        | 0.1412               | 0.1693 |
| GROa       | 3.73                         | 3.73         | 4.73            | 0.7421                 | 0.9805 | 0.3722                   | 0.1820        | 0.1481               | 0.1693 |
| ICAM-1     | 828.72                       | 806.21       | 979.12          | 0.8170                 | 0.9805 | 0.0365                   | 0.0536        | 0.0156               | 0.0531 |
| IL-1a      | 0.13                         | 0.12         | 0.12            | 0.9593                 | 0.9805 | 0.4962                   | 0.2239        | 0.2053               | 0.2097 |
| IL-2Ra     | 49.19                        | 45.78        | 39.44           | 0.5508                 | 0.9805 | 0.1144                   | 0.0875        | 0.2531               | 0.2242 |
| IL-3       | 71.01                        | 69.32        | 69.64           | 0.7149                 | 0.9805 | 0.7367                   | 0.2882        | 0.8233               | 0.4501 |
| IL-12p40   | 216.90                       | 223.82       | 216.59          | 0.8076                 | 0.9805 | 0.5392                   | 0.2315        | 0.5113               | 0.3475 |
| IL-16      | 185.68                       | 170.73       | 267.55          | 0.5187                 | 0.9805 | 0.0294                   | <b>0.0470</b> | 0.0130               | 0.0531 |
| IL-18      | 6.08                         | 5.47         | 4.11            | 0.8171                 | 0.9805 | 1.0000                   | 0.3520        | 0.9895               | 0.4977 |
| LIF        | 1.92                         | 2.28         | 1.17            | 0.6968                 | 0.9805 | 0.2034                   | 0.1279        | 0.0659               | 0.1274 |
| MCP-3      | 16.09                        | 16.36        | 18.26           | 0.3937                 | 0.9805 | 0.1982                   | 0.1279        | 0.7228               | 0.4227 |
| M-CSF      | 0.33                         | 0.32         | 0.33            | 0.9319                 | 0.9805 | 0.8951                   | 0.3215        | 0.9371               | 0.4864 |
| MIF        | 75.35                        | 94.57        | 210.55          | 0.4954                 | 0.9805 | 0.0135                   | <b>0.0264</b> | 0.1062               | 0.1483 |
| MIG        | 452.94                       | 432.04       | 533.47          | 0.7240                 | 0.9805 | 0.1649                   | 0.1161        | 0.0806               | 0.1352 |
| b-NGF      | 7.32                         | 7.48         | 7.20            | 0.7516                 | 0.9805 | 0.2033                   | 0.1279        | 0.1377               | 0.1693 |
| SCF        | 82.52                        | 72.73        | 61.65           | 0.9127                 | 0.9805 | 0.0722                   | 0.0777        | 0.1448               | 0.1693 |
| SCGF       | 1261.96                      | 1191.07      | 1355.14         | 0.6878                 | 0.9805 | 0.2364                   | 0.1342        | 0.3788               | 0.2977 |
| SDF-1a     | 49.09                        | 57.54        | 46.12           | 0.2785                 | 0.9805 | 0.7589                   | 0.2884        | 0.0979               | 0.1448 |
| TNFb       | 0.32                         | 0.32         | 0.32            | 0.6825                 | 0.9805 | 0.2926                   | 0.1560        | 0.5360               | 0.3547 |
| TRAIL      | 32.60                        | 31.65        | 32.38           | 0.7424                 | 0.9805 | 0.7367                   | 0.2882        | 0.7625               | 0.4358 |
| VCAM-1     | 1156.08                      | 1061.17      | 1303.37         | 0.6006                 | 0.9805 | 0.2364                   | 0.1342        | 0.0806               | 0.1352 |
| HGF        | 331.54                       | 329.31       | 376.77          | 0.2895                 | 0.9805 | 0.2364                   | 0.1342        | 0.6839               | 0.4095 |
| IFNa2      | 17.43                        | 16.94        | 17.36           | 0.6878                 | 0.9805 | 0.7700                   | 0.2884        | 0.9476               | 0.4864 |

157

158

**Table S3.** Pair-wise Wilcoxon rank-sum tests – Cycle Phase

| Cytokine   | Median Concentration (pg/mL) |         |            |         | Controls   |        | Endometriosis |        |
|------------|------------------------------|---------|------------|---------|------------|--------|---------------|--------|
|            | Follicular                   | Luteal  | Follicular | Luteal  | Unadjusted | BH     | Unadjusted    | BH     |
|            | (-)                          | (-)     | (+)        | (+)     |            |        |               |        |
| PDGF-bb    | 2.50                         | 2.35    | 2.50       | 2.50    | 0.5930     | 1.0000 | 0.9685        | 0.8925 |
| IL-1b      | 0.23                         | 0.22    | 0.26       | 0.27    | 0.3959     | 0.9166 | 0.9685        | 0.8925 |
| IP-10      | 588.31                       | 903.94  | 674.08     | 841.48  | 0.1965     | 0.8983 | 0.0719        | 0.4128 |
| IL-1ra     | 12.27                        | 12.27   | 13.46      | 12.27   | 1.0000     | 1.0000 | 0.8232        | 0.8747 |
| IL-2       | 0.15                         | 0.14    | 0.12       | 0.15    | 0.9393     | 1.0000 | 0.0849        | 0.4211 |
| IL-4       | 0.33                         | 0.31    | 0.36       | 0.35    | 0.8189     | 1.0000 | 0.7721        | 0.8747 |
| IL-5       | 0.51                         | 0.52    | 0.52       | 0.52    | 0.7893     | 1.0000 | 0.7321        | 0.8747 |
| IL-6       | 8.19                         | 18.42   | 13.15      | 8.76    | 0.3047     | 0.8983 | 0.1761        | 0.5351 |
| IL-7       | 4.87                         | 5.33    | 4.98       | 5.07    | 0.7322     | 1.0000 | 0.7625        | 0.8747 |
| IL-8       | 2.07                         | 2.83    | 3.33       | 3.63    | 0.3619     | 0.9048 | 1.0000        | 0.8925 |
| IL-9       | 2.95                         | 2.57    | 2.95       | 3.72    | 0.9696     | 1.0000 | 0.0030        | 0.0660 |
| IL-10      | 1.67                         | 2.27    | 2.53       | 1.93    | 0.1105     | 0.8983 | 0.1485        | 0.5097 |
| IL-12(p70) | 2.76                         | 2.35    | 2.76       | 2.53    | 0.2545     | 0.8983 | 0.6268        | 0.8747 |
| IL-13      | 0.67                         | 0.62    | 0.72       | 0.66    | 0.5423     | 1.0000 | 0.1306        | 0.5097 |
| IL-15      | 1.06                         | 1.56    | 1.58       | 1.21    | 0.0333     | 0.8983 | 0.0740        | 0.4128 |
| IL-17      | 0.68                         | 0.72    | 0.76       | 0.79    | 0.6728     | 1.0000 | 0.1431        | 0.5097 |
| Eotaxin    | 58.41                        | 82.86   | 88.90      | 95.93   | 0.2871     | 0.8983 | 0.7033        | 0.8747 |
| FGFb       | 0.91                         | 0.89    | 0.94       | 0.93    | 1.0000     | 1.0000 | 0.7825        | 0.8747 |
| G-CSF      | 1.74                         | 1.69    | 2.39       | 1.90    | 0.9391     | 1.0000 | 0.3244        | 0.8042 |
| GM-CSF     | 0.06                         | 0.10    | 0.09       | 0.12    | 0.3410     | 0.8983 | 0.0109        | 0.1623 |
| IFN-g      | 23.00                        | 25.73   | 27.51      | 30.79   | 0.7322     | 1.0000 | 0.6361        | 0.8747 |
| MCP-1      | 28.78                        | 51.40   | 64.47      | 65.59   | 0.4033     | 0.9166 | 0.4230        | 0.8505 |
| MIP-1a     | 0.89                         | 0.84    | 0.89       | 0.98    | 0.4931     | 1.0000 | 0.0646        | 0.4128 |
| MIP-1b     | 1.14                         | 1.26    | 1.14       | 1.36    | 0.3414     | 0.8983 | 0.0247        | 0.2752 |
| RANTES     | 1.84                         | 2.34    | 3.06       | 2.59    | 0.2227     | 0.8983 | 0.4945        | 0.8747 |
| TNF-a      | 3.85                         | 3.74    | 4.14       | 4.64    | 0.8786     | 1.0000 | 0.2370        | 0.6610 |
| VEGF       | 16.65                        | 14.48   | 17.43      | 16.29   | 0.7038     | 1.0000 | 0.6363        | 0.8747 |
| CTACK      | 104.66                       | 111.05  | 90.61      | 102.75  | 0.9394     | 1.0000 | 0.0979        | 0.4368 |
| GROa       | 3.40                         | 3.89    | 3.73       | 4.57    | 0.2386     | 0.8983 | 0.1799        | 0.5351 |
| ICAM-1     | 825.79                       | 831.64  | 831.64     | 833.30  | 0.5687     | 1.0000 | 0.7327        | 0.8747 |
| IL-1a      | 0.13                         | 0.13    | 0.12       | 0.12    | 0.4946     | 1.0000 | 0.9891        | 0.8925 |
| IL-2Ra     | 48.81                        | 50.61   | 42.32      | 45.42   | 0.7040     | 1.0000 | 0.9476        | 0.8925 |
| IL-3       | 73.62                        | 68.40   | 68.78      | 73.85   | 0.5949     | 1.0000 | 0.8029        | 0.8747 |
| IL-12p40   | 213.41                       | 218.61  | 212.14     | 223.94  | 1.0000     | 1.0000 | 0.4700        | 0.8738 |
| IL-16      | 184.78                       | 200.19  | 184.78     | 191.96  | 0.5947     | 1.0000 | 0.4384        | 0.8505 |
| IL-18      | 8.65                         | 5.44    | 4.53       | 5.88    | 0.1286     | 0.8983 | 0.6646        | 0.8747 |
| LIF        | 1.47                         | 2.02    | 1.60       | 2.33    | 0.2875     | 0.8983 | 0.0551        | 0.4128 |
| MCP-3      | 12.86                        | 16.55   | 18.14      | 16.62   | 0.0805     | 0.8983 | 0.8851        | 0.8925 |
| M-CSF      | 0.32                         | 0.34    | 0.30       | 0.38    | 1.0000     | 1.0000 | 0.0021        | 0.0660 |
| MIF        | 95.59                        | 60.67   | 117.40     | 87.56   | 0.1106     | 0.8983 | 0.2994        | 0.7860 |
| MIG        | 278.30                       | 462.03  | 482.08     | 416.41  | 0.3233     | 0.8983 | 0.7229        | 0.8747 |
| b-NGF      | 7.28                         | 7.32    | 7.37       | 7.43    | 0.9697     | 1.0000 | 0.6269        | 0.8747 |
| SCF        | 96.38                        | 71.04   | 69.49      | 71.31   | 0.2241     | 0.8983 | 0.4306        | 0.8505 |
| SCGF       | 1284.13                      | 1239.79 | 1191.07    | 1347.98 | 0.7040     | 1.0000 | 0.8233        | 0.8747 |
| SDF-1a     | 51.24                        | 46.94   | 51.09      | 54.22   | 1.0000     | 1.0000 | 0.4383        | 0.8505 |
| TNFb       | 0.32                         | 0.32    | 0.32       | 0.32    | 0.3185     | 0.8983 | 0.5097        | 0.8747 |
| TRAIL      | 26.24                        | 34.54   | 32.74      | 29.80   | 0.1286     | 0.8983 | 0.4383        | 0.8505 |
| VCAM-1     | 1101.68                      | 1262.57 | 1212.30    | 1172.52 | 0.1489     | 0.8983 | 0.5902        | 0.8747 |
| HGF        | 347.02                       | 270.51  | 370.93     | 333.56  | 1.0000     | 1.0000 | 0.9686        | 0.8925 |
| IFNa2      | 17.16                        | 17.61   | 16.94      | 17.42   | 0.9394     | 1.0000 | 0.8955        | 0.8925 |

160 **Table S4.** Pair-wise Wilcoxon rank-sum tests – Recurrence Status  
 161

| Cytokine   | Median Concentration (pg/mL) |                   | Recurrent Disease vs. Initial Diagnosis |        |
|------------|------------------------------|-------------------|-----------------------------------------|--------|
|            | Initial Diagnosis            | Recurrent Disease | Unadjusted                              | BH     |
| PDGF-bb    | 2.5                          | 2.5               | 0.5778                                  | 1.0000 |
| IL-1b      | 0.26                         | 0.27              | 0.6741                                  | 1.0000 |
| IP-10      | 674.08                       | 777.26            | 0.2284                                  | 1.0000 |
| IL-1ra     | 13.46                        | 12.985            | 0.9137                                  | 1.0000 |
| IL-2       | 0.13                         | 0.155             | 0.1160                                  | 1.0000 |
| IL-4       | 0.35                         | 0.36              | 0.5151                                  | 1.0000 |
| IL-5       | 0.5                          | 0.55              | 0.2221                                  | 1.0000 |
| IL-6       | 14.91                        | 9.86              | 0.5976                                  | 1.0000 |
| IL-7       | 4.49                         | 5.29              | 0.5606                                  | 1.0000 |
| IL-8       | 3.76                         | 3.405             | 0.8817                                  | 1.0000 |
| IL-9       | 3.11                         | 3.58              | 0.0782                                  | 1.0000 |
| IL-10      | 2.3                          | 2.175             | 1.0000                                  | 1.0000 |
| IL-12(p70) | 2.62                         | 2.71              | 0.9784                                  | 1.0000 |
| IL-13      | 0.72                         | 0.685             | 0.6068                                  | 1.0000 |
| IL-15      | 1.24                         | 1.435             | 0.5697                                  | 1.0000 |
| IL-17      | 0.76                         | 0.76              | 0.8477                                  | 1.0000 |
| Eotaxin    | 89.44                        | 90.645            | 0.8603                                  | 1.0000 |
| FGFb       | 0.88                         | 0.96              | 0.0527                                  | 1.0000 |
| G-CSF      | 2.03                         | 2.185             | 0.9030                                  | 1.0000 |
| GM-CSF     | 0.1                          | 0.1               | 0.9892                                  | 1.0000 |
| IFN-g      | 27.51                        | 27.955            | 0.6549                                  | 1.0000 |
| MCP-1      | 43.11                        | 85.98             | 0.1103                                  | 1.0000 |
| MIP-1a     | 0.89                         | 0.92              | 0.8704                                  | 1.0000 |
| MIP-1b     | 1.15                         | 1.22              | 0.1632                                  | 1.0000 |
| RANTES     | 3.83                         | 2.56              | 0.3433                                  | 1.0000 |
| TNF-a      | 4.2                          | 4.17              | 0.7970                                  | 1.0000 |
| VEGF       | 16.06                        | 17.435            | 0.3366                                  | 1.0000 |
| CTACK      | 94.18                        | 92.67             | 0.7351                                  | 1.0000 |
| GROa       | 4.35                         | 3.645             | 0.2969                                  | 1.0000 |
| ICAM-1     | 831.64                       | 845.67            | 0.7556                                  | 1.0000 |
| IL-1a      | 0.12                         | 0.12              | 0.4742                                  | 1.0000 |
| IL-2Ra     | 45.35                        | 43.605            | 0.9892                                  | 1.0000 |
| IL-3       | 79.96                        | 67.81             | 0.1133                                  | 1.0000 |
| IL-12p40   | 223.82                       | 213.41            | 0.3717                                  | 1.0000 |
| IL-16      | 179.21                       | 205.625           | 0.4901                                  | 1.0000 |
| IL-18      | 5.1                          | 5.38              | 0.2973                                  | 1.0000 |
| LIF        | 1.99                         | 1.795             | 0.8710                                  | 1.0000 |
| MCP-3      | 18.37                        | 16.985            | 0.7452                                  | 1.0000 |
| M-CSF      | 0.32                         | 0.33              | 0.8495                                  | 1.0000 |
| MIF        | 117.4                        | 92.38             | 0.6552                                  | 1.0000 |
| MIG        | 435.18                       | 458.115           | 0.8817                                  | 1.0000 |
| b-NGF      | 7.38                         | 7.38              | 1.0000                                  | 1.0000 |
| SCF        | 71.04                        | 71.09             | 0.6650                                  | 1.0000 |
| SCGF       | 1216.32                      | 1236.435          | 0.6650                                  | 1.0000 |
| SDF-1a     | 51.09                        | 51.605            | 0.7970                                  | 1.0000 |
| TNFb       | 0.35                         | 0.32              | 0.2858                                  | 1.0000 |
| TRAIL      | 32.01                        | 31.65             | 0.6165                                  | 1.0000 |
| VCAM-1     | 1237.57                      | 1123.315          | 0.8180                                  | 1.0000 |
| HGF        | 297.14                       | 375.135           | 0.1553                                  | 1.0000 |
| IFNa2      | 18.98                        | 16.73             | 0.1593                                  | 1.0000 |

162 **Table S5.** Pair-wise Wilcoxon rank-sum tests – Lesion Distribution

163

| Cytokine   | Median Concentration (pg/mL) |            |         |         | Peritoneal vs. Controls |        | Ovarian vs. Controls |        | Deep vs. Controls |        |
|------------|------------------------------|------------|---------|---------|-------------------------|--------|----------------------|--------|-------------------|--------|
|            | Controls                     | Peritoneal | Ovarian | Deep    | Unadjusted              | BH     | Unadjusted           | BH     | Unadjusted        | BH     |
| PDGF-bb    | 2.43                         | 2.50       | 1.86    | 2.31    | 0.8165                  | 1.0000 | 0.0343               | 0.8201 | 0.7596            | 0.9786 |
| IL-1b      | 0.22                         | 0.23       | 0.21    | 0.25    | 0.5203                  | 1.0000 | 0.3056               | 0.9257 | 0.0956            | 0.4316 |
| IP-10      | 706.02                       | 736.40     | 838.86  | 786.78  | 1.0000                  | 1.0000 | 0.5823               | 0.9751 | 0.2128            | 0.6130 |
| IL-1ra     | 12.63                        | 13.00      | 11.87   | 15.06   | 0.9805                  | 1.0000 | 0.5970               | 0.9751 | 0.1145            | 0.4316 |
| IL-2       | 0.14                         | 0.14       | 0.14    | 0.13    | 0.9414                  | 1.0000 | 0.9297               | 1.0000 | 0.7792            | 0.9786 |
| IL-4       | 0.31                         | 0.34       | 0.32    | 0.31    | 0.7503                  | 1.0000 | 0.8945               | 1.0000 | 0.7580            | 0.9786 |
| IL-5       | 0.51                         | 0.52       | 0.47    | 0.53    | 0.7507                  | 1.0000 | 0.9649               | 1.0000 | 0.8185            | 0.9786 |
| IL-6       | 9.72                         | 9.60       | 6.43    | 8.98    | 0.9127                  | 1.0000 | 0.0989               | 0.9257 | 1.0000            | 1.0000 |
| IL-7       | 5.15                         | 5.14       | 5.28    | 6.37    | 0.9320                  | 1.0000 | 0.8430               | 1.0000 | 0.2524            | 0.6130 |
| IL-8       | 2.25                         | 2.46       | 2.07    | 3.36    | 0.6966                  | 1.0000 | 0.1724               | 0.9257 | 0.0793            | 0.4316 |
| IL-9       | 2.81                         | 2.91       | 3.11    | 3.21    | 0.6000                  | 1.0000 | 0.2079               | 0.9257 | 0.0705            | 0.4316 |
| IL-10      | 1.83                         | 1.88       | 1.59    | 2.65    | 0.9514                  | 1.0000 | 0.1525               | 0.9257 | 0.8587            | 0.9786 |
| IL-12(p70) | 2.41                         | 2.47       | 2.29    | 2.47    | 0.7421                  | 1.0000 | 0.3906               | 0.9257 | 0.9797            | 1.0000 |
| IL-13      | 0.63                         | 0.64       | 0.64    | 0.64    | 0.8167                  | 1.0000 | 1.0000               | 1.0000 | 0.5083            | 0.8301 |
| IL-15      | 1.01                         | 0.96       | 0.98    | 1.84    | 0.8169                  | 1.0000 | 0.3669               | 0.9257 | 0.0118            | 0.2897 |
| IL-17      | 0.70                         | 0.76       | 0.71    | 0.76    | 0.6836                  | 1.0000 | 0.9294               | 1.0000 | 0.0845            | 0.4316 |
| Eotaxin    | 46.98                        | 47.26      | 49.15   | 105.09  | 0.9708                  | 1.0000 | 0.5822               | 0.9751 | 0.0394            | 0.4316 |
| FGFb       | 0.91                         | 0.94       | 0.87    | 1.05    | 0.3729                  | 1.0000 | 0.5375               | 0.9751 | 0.2627            | 0.6130 |
| G-CSF      | 1.69                         | 1.81       | 1.68    | 2.11    | 0.4632                  | 1.0000 | 0.7914               | 1.0000 | 0.0190            | 0.3102 |
| GM-CSF     | 0.12                         | 0.12       | 0.10    | 0.11    | 0.6335                  | 1.0000 | 0.5955               | 0.9751 | 0.5568            | 0.8553 |
| IFN-g      | 23.93                        | 24.10      | 24.10   | 22.74   | 0.6786                  | 1.0000 | 0.9649               | 1.0000 | 0.9391            | 1.0000 |
| MCP-1      | 41.01                        | 40.81      | 50.72   | 81.55   | 0.9127                  | 1.0000 | 0.8776               | 1.0000 | 0.0446            | 0.4316 |
| MIP-1a     | 0.87                         | 0.89       | 0.79    | 0.97    | 0.6516                  | 1.0000 | 0.3649               | 0.9257 | 0.3868            | 0.7285 |
| MIP-1b     | 1.20                         | 1.21       | 1.05    | 1.10    | 0.9030                  | 1.0000 | 0.3328               | 0.9257 | 0.1544            | 0.5042 |
| RANTES     | 2.34                         | 2.34       | 2.10    | 2.83    | 0.6688                  | 1.0000 | 0.1786               | 0.9257 | 0.3590            | 0.7285 |
| TNF-a      | 3.79                         | 3.85       | 3.99    | 4.03    | 0.7140                  | 1.0000 | 0.4142               | 0.9257 | 0.7404            | 0.9786 |
| VEGF       | 14.25                        | 15.20      | 10.64   | 13.73   | 0.7513                  | 1.0000 | 0.2711               | 0.9257 | 0.5586            | 0.8553 |
| CTACK      | 107.48                       | 108.09     | 116.27  | 75.14   | 0.9320                  | 1.0000 | 0.4156               | 0.9257 | 0.0984            | 0.4316 |
| GROa       | 3.88                         | 3.90       | 3.28    | 3.91    | 0.8357                  | 1.0000 | 0.3219               | 0.9257 | 0.8189            | 0.9786 |
| ICAM-1     | 837.80                       | 831.64     | 889.34  | 826.38  | 0.9127                  | 1.0000 | 0.7084               | 1.0000 | 0.7410            | 0.9786 |
| IL-2Ra     | 49.19                        | 45.49      | 44.02   | 57.23   | 0.4574                  | 1.0000 | 0.5234               | 0.9751 | 0.2525            | 0.6130 |
| IL-3       | 69.20                        | 67.01      | 65.16   | 68.29   | 0.8934                  | 1.0000 | 0.9824               | 1.0000 | 0.9190            | 1.0000 |
| IL-12p40   | 216.89                       | 215.19     | 215.35  | 214.53  | 0.9223                  | 1.0000 | 0.8430               | 1.0000 | 1.0000            | 1.0000 |
| IL-16      | 185.67                       | 188.80     | 137.29  | 206.36  | 0.6173                  | 1.0000 | 0.0209               | 0.8201 | 0.3467            | 0.7285 |
| IL-18      | 4.77                         | 4.52       | 3.31    | 5.32    | 0.9320                  | 1.0000 | 0.4156               | 0.9257 | 0.4305            | 0.7534 |
| LIF        | 2.40                         | 2.38       | 2.54    | 3.75    | 1.0000                  | 1.0000 | 0.6920               | 1.0000 | 0.2855            | 0.6358 |
| MCP-3      | 13.39                        | 13.41      | 12.72   | 12.73   | 0.7057                  | 1.0000 | 0.7917               | 1.0000 | 0.9594            | 1.0000 |
| M-CSF      | 0.33                         | 0.33       | 0.31    | 0.38    | 1.0000                  | 1.0000 | 0.4540               | 0.9551 | 0.1088            | 0.4316 |
| MIF        | 70.06                        | 90.30      | 59.13   | 98.48   | 0.7057                  | 1.0000 | 0.3670               | 0.9257 | 0.1472            | 0.5042 |
| MIG        | 452.94                       | 451.86     | 433.61  | 569.86  | 0.8742                  | 1.0000 | 0.4156               | 0.9257 | 0.2525            | 0.6130 |
| b-NGF      | 7.52                         | 7.48       | 7.40    | 8.42    | 0.9903                  | 1.0000 | 0.7917               | 1.0000 | 0.5933            | 0.8810 |
| SCF        | 76.00                        | 79.66      | 62.09   | 86.57   | 0.6522                  | 1.0000 | 0.3011               | 0.9257 | 0.8190            | 0.9786 |
| SCGF       | 1261.77                      | 1284.13    | 1061.32 | 1430.55 | 0.8169                  | 1.0000 | 0.4678               | 0.9551 | 0.4014            | 0.7285 |
| SDF-1a     | 51.90                        | 57.23      | 52.74   | 65.75   | 0.6260                  | 1.0000 | 0.8950               | 1.0000 | 0.1092            | 0.4316 |
| TNFb       | 0.33                         | 0.34       | 0.34    | 0.33    | 0.8153                  | 1.0000 | 0.7905               | 1.0000 | 0.8574            | 0.9786 |
| TRAIL      | 36.52                        | 38.69      | 27.00   | 43.35   | 0.7607                  | 1.0000 | 0.0502               | 0.8201 | 0.4014            | 0.7285 |
| VCAM-1     | 1081.96                      | 1110.15    | 1065.03 | 834.71  | 0.9127                  | 1.0000 | 0.7414               | 1.0000 | 0.1947            | 0.5963 |
| HGF        | 324.22                       | 327.65     | 246.95  | 536.20  | 0.6522                  | 1.0000 | 0.1657               | 0.9257 | 0.0029            | 0.1436 |
| IFNa2      | 17.43                        | 17.61      | 16.70   | 16.10   | 0.9223                  | 1.0000 | 0.9124               | 1.0000 | 0.4609            | 0.7787 |

164

165



165 **Table S6.** Pair-wise Wilcoxon rank-sum tests – Primary Indication  
 166

| Cytokine   | Median Concentration (pg/mL) |                      | Infertility vs. Pain |        |
|------------|------------------------------|----------------------|----------------------|--------|
|            | Pain Only                    | Infertility +/- Pain | Unadjusted           | BH     |
| PDGF-bb    | 2.5                          | 2.13                 | 0.4126               | 0.8618 |
| IL-1b      | 0.26                         | 0.285                | 0.4466               | 0.8618 |
| IP-10      | 707.89                       | 689.47               | 0.5569               | 0.8618 |
| IL-1ra     | 13.06                        | 13.455               | 0.5188               | 0.8618 |
| IL-2       | 0.14                         | 0.165                | 0.6566               | 0.8872 |
| IL-4       | 0.35                         | 0.445                | 0.2334               | 0.8192 |
| IL-5       | 0.55                         | 0.48                 | 0.9199               | 0.9738 |
| IL-6       | 10.97                        | 12.645               | 0.5007               | 0.8618 |
| IL-7       | 5.06                         | 5.145                | 0.4916               | 0.8618 |
| IL-8       | 3.79                         | 3.1                  | 0.7965               | 0.9738 |
| IL-9       | 3.11                         | 3.35                 | 0.2174               | 0.8192 |
| IL-10      | 2.12                         | 2.62                 | 0.6160               | 0.8801 |
| IL-12(p70) | 2.62                         | 2.96                 | 0.5097               | 0.8618 |
| IL-13      | 0.72                         | 0.695                | 1.0000               | 1.0000 |
| IL-15      | 1.42                         | 0.985                | 0.0855               | 0.8192 |
| IL-17      | 0.76                         | 0.76                 | 0.8731               | 0.9738 |
| Eotaxin    | 102.89                       | 67.645               | 0.1184               | 0.8192 |
| FGFb       | 0.94                         | 0.935                | 0.9428               | 0.9738 |
| G-CSF      | 2.34                         | 1.82                 | 0.5860               | 0.8618 |
| GM-CSF     | 0.12                         | 0.09                 | 0.0615               | 0.8192 |
| IFN-g      | 27.51                        | 28.54                | 0.5567               | 0.8618 |
| MCP-1      | 51.41                        | 92.495               | 0.1253               | 0.8192 |
| MIP-1a     | 0.89                         | 0.94                 | 0.7955               | 0.9738 |
| MIP-1b     | 1.2                          | 1.12                 | 0.4737               | 0.8618 |
| RANTES     | 2.66                         | 2.81                 | 0.8075               | 0.9738 |
| TNF-a      | 4.2                          | 4.01                 | 0.5006               | 0.8618 |
| VEGF       | 15.36                        | 21.44                | 0.2126               | 0.8192 |
| CTACK      | 92.91                        | 100.1                | 0.6989               | 0.9196 |
| GROa       | 4.35                         | 3.2                  | 0.1599               | 0.8192 |
| ICAM-1     | 818.72                       | 950.84               | 0.2233               | 0.8192 |
| IL-1a      | 0.12                         | 0.115                | 0.0249               | 0.8192 |
| IL-2Ra     | 45.49                        | 39.33                | 0.3821               | 0.8618 |
| IL-3       | 69.32                        | 72.485               | 0.8974               | 0.9738 |
| IL-12p40   | 219.76                       | 216.585              | 0.4737               | 0.8618 |
| IL-16      | 198.74                       | 167.4                | 0.2126               | 0.8192 |
| IL-18      | 4.89                         | 6.485                | 0.4307               | 0.8618 |
| LIF        | 1.99                         | 1.605                | 0.2458               | 0.8192 |
| MCP-3      | 17.64                        | 16.49                | 0.4915               | 0.8618 |
| M-CSF      | 0.32                         | 0.31                 | 0.2015               | 0.8192 |
| MIF        | 114.75                       | 81.015               | 0.6364               | 0.8838 |
| MIG        | 482.08                       | 336.64               | 0.3517               | 0.8618 |
| b-NGF      | 7.38                         | 7.32                 | 0.9543               | 0.9738 |
| SCF        | 71.48                        | 54.61                | 0.1253               | 0.8192 |
| SCGF       | 1202.35                      | 1366.225             | 0.9087               | 0.9738 |
| SDF-1a     | 57.54                        | 48.245               | 0.1922               | 0.8192 |
| TNFb       | 0.32                         | 0.32                 | 0.8487               | 0.9738 |
| TRAIL      | 31.65                        | 31.83                | 0.8298               | 0.9738 |
| VCAM-1     | 1091.14                      | 1274.385             | 0.2956               | 0.8618 |
| HGF        | 342.44                       | 412.09               | 0.5763               | 0.8618 |
| IFNa2      | 16.86                        | 18.37                | 0.2826               | 0.8618 |

167  
 168

168  
169  
170

**Table S7.** Reported associations between peritoneal cytokines, chemokines, growth factors and pelvic endometriosis.

| Interleukins  | Endometriosis vs. Controls |                    |                    |            |
|---------------|----------------------------|--------------------|--------------------|------------|
|               | Increased                  | No Difference      | Decreased          | Transient  |
| IL-1          |                            | Koyama 1993        |                    |            |
| IL-1 $\alpha$ | Kondera-Anasz 2005         | Dziunycz 2009      |                    |            |
| IL-1 $\beta$  | Fakih 1987                 | Keenan 1989        |                    |            |
|               | Taketani 1992              | Kalu 2007          |                    |            |
|               | Ho 1996                    | Bedaiwy 2002       |                    |            |
|               | Sukhikh 2004               | Oku 2004           |                    |            |
|               | Mier-Cabrerra 2010         | Milewski 2008      |                    |            |
|               | Michaud 2011               |                    |                    |            |
|               | Sikora 2012                |                    |                    |            |
| IL-1Ra        | Kondera-Anasz 2005         | Ho 1996            | Zhang 2007         |            |
|               |                            | Bersinger 2012     | Mier-Cabrerra 2010 |            |
| IL-1 sRII     |                            |                    | Kondera-Anasz 2005 |            |
| sIL1RAcP      |                            |                    | Michaud 2011       |            |
| IL-2          |                            | Punnonen 1996      | Hsu 1997           |            |
|               |                            | Oku 2004           |                    |            |
|               |                            | Podgaec 2007       |                    |            |
|               |                            | Hassa 2009         |                    |            |
|               |                            | Mier-Cabrerra 2010 |                    |            |
| IL-2Ra        |                            |                    |                    |            |
| IL-3          |                            |                    |                    |            |
| IL-4          | Hsu 1997                   | Punnonen 1996      |                    |            |
|               |                            | Oku 2004           |                    |            |
|               |                            | Podgaec 2007       |                    |            |
|               |                            | Hassa 2009         |                    |            |
|               |                            | Mier-Cabrerra 2010 |                    |            |
| IL-5          | Koyama 1993                | Punnonen 1996      |                    |            |
| IL-6          | Koyama 1993                | Keenan 1989        |                    |            |
|               | Rier 1995                  | Oku 2004           |                    |            |
|               | Ho 1996                    |                    |                    |            |
|               | Punnonen 1996              |                    |                    |            |
|               | Harada 1997                |                    |                    |            |
|               | Bedaiwy 2002               |                    |                    |            |
|               | Khan 2002                  |                    |                    |            |
|               | Kalu 2007                  |                    |                    |            |
|               | Milewski 2008              |                    |                    |            |
|               | Dziunycz 2009              |                    |                    |            |
|               | Mier-Cabrerra 2010         |                    |                    |            |
|               | Velasco 2010               |                    |                    |            |
|               | Drosdzol-Cop 2012          |                    |                    |            |
|               | Bersinger 2012             |                    |                    |            |
| IL-6sR        |                            |                    | Rier 1995          |            |
| IL-7          |                            |                    |                    |            |
| IL-9          |                            |                    |                    |            |
| IL-10         | Punnonen 1996              | Rana 1996          |                    | Ho 1997    |
|               | Tabibzadeh 2003            | Hsu 1997           |                    |            |
|               | Kondera-Anasz 2004         | Oku 2004           |                    |            |
|               | Podgaec 2007               | Hassa 2009         |                    |            |
|               | Mier-Cabrerra 2010         | Andreoli 2011      |                    |            |
|               |                            | Bersinger 2012     |                    |            |
|               |                            | Gazvani 2001       |                    |            |
| IL-11         |                            | Zeyneloglu 1998    |                    | Ho 1997    |
| IL-12(p70)    | Mazzeo 1998                | Gazvani 2001       |                    |            |
|               | Gallinelli 2004            | Mier-Cabrerra 2010 |                    |            |
|               | Fairbanks 2009             | Andreoli 2011      |                    |            |
|               |                            | Bersinger 2012     |                    |            |
| IL-12(p40)    |                            | Mazzeo 1998        |                    |            |
| IL-13         |                            | Bedaiwy 2002       | McLaren 1997       |            |
|               |                            | Mier-Cabrerra 2010 | Gallinelli 2004    |            |
|               |                            | Velasco 2010       |                    |            |
| IL-14         |                            |                    |                    |            |
| IL-15         |                            | Bersinger 2012     | Mier-Cabrerra 2010 | Arici 2003 |
| IL-16         | Koga 2005                  |                    |                    |            |

|                                                 |                                                                                                                               |                                                                                                             |                                                     |             |
|-------------------------------------------------|-------------------------------------------------------------------------------------------------------------------------------|-------------------------------------------------------------------------------------------------------------|-----------------------------------------------------|-------------|
| IL-17                                           |                                                                                                                               | Velasco 2010<br>Andreoli 2011                                                                               |                                                     | Zhang 2005  |
| IL-18                                           | Oku 2004<br>Bersinger 2012                                                                                                    | Fairbanks 2009<br>Glitz 2009                                                                                | Zhang 2004<br>Sikora 2012                           | Arici 2003  |
| IL-19                                           |                                                                                                                               |                                                                                                             |                                                     |             |
| IL-20                                           |                                                                                                                               |                                                                                                             |                                                     |             |
| IL-21                                           |                                                                                                                               |                                                                                                             |                                                     |             |
| IL-22                                           |                                                                                                                               |                                                                                                             |                                                     |             |
| IL-23                                           | Andreoli 2011                                                                                                                 |                                                                                                             |                                                     |             |
| IL-24                                           |                                                                                                                               |                                                                                                             |                                                     |             |
| IL-25                                           |                                                                                                                               |                                                                                                             |                                                     |             |
| IL-26                                           |                                                                                                                               |                                                                                                             |                                                     |             |
| IL-27                                           |                                                                                                                               |                                                                                                             |                                                     |             |
| IL-28                                           |                                                                                                                               |                                                                                                             |                                                     |             |
| IL-29                                           |                                                                                                                               |                                                                                                             |                                                     |             |
| IL-30                                           |                                                                                                                               |                                                                                                             |                                                     |             |
| IL-31                                           |                                                                                                                               |                                                                                                             |                                                     |             |
| IL-32                                           |                                                                                                                               |                                                                                                             |                                                     |             |
| IL-33                                           | Santulli 2012                                                                                                                 |                                                                                                             |                                                     |             |
| IL-35                                           |                                                                                                                               |                                                                                                             |                                                     |             |
| IL-36                                           |                                                                                                                               |                                                                                                             |                                                     |             |
| IL-37                                           |                                                                                                                               |                                                                                                             |                                                     |             |
| IL-38                                           |                                                                                                                               |                                                                                                             |                                                     |             |
| MIF                                             | Kats 2002<br>Mahutta 2004                                                                                                     |                                                                                                             |                                                     |             |
| IFN $\alpha$ 2                                  |                                                                                                                               | Sukhikh 2004                                                                                                |                                                     |             |
| IFN $\gamma$                                    | Podgaec 2007                                                                                                                  | Keenan 1989<br>Khorram 1993<br>Oku 2004<br>Sukhikh 2004<br>Milewski 2008<br>Hassa 2009                      | Ho 1996<br>Hsu 1997<br>Wu 1998<br>Mier-Cabrera 2010 |             |
| <b>TNF Superfamily</b>                          |                                                                                                                               |                                                                                                             |                                                     |             |
| TNF $\alpha$                                    | Rana 1996<br>Ho 1996<br>Overton 1996<br>Harada 1997<br>Bedaiwy 2002<br>Sukhikh 2004<br>Mier-Cabrera 2010<br>Drosdzol-Cop 2012 | Keenan 1989<br>Calhaz-Jorge 2000<br>Oku 2004<br>Kalu 2007<br>Podgaec 2007<br>Milewski 2008<br>Dziunycz 2009 |                                                     | Pizzo 2002  |
| TNFRSF1A/B/sTNFR<br>TNFRSF11B/OPG               | Koga 2000<br>Harada 2004<br>Bersinger 2006                                                                                    |                                                                                                             |                                                     |             |
| TNF $\beta$<br>TRAIL<br>sFas<br>sFasL<br>ICAM-1 |                                                                                                                               |                                                                                                             |                                                     | Harada 2004 |
| VCAM-1                                          |                                                                                                                               | Kalu 2007<br>Kalu 2007<br>Somigliana 1996<br>Daniel 2000<br>Bersinger 2012<br>Daniel 2000<br>Bersinger 2012 |                                                     |             |
| TGF $\beta$                                     | Oosterlynck 1994<br>Kupker 1998<br>Pizzo 2002                                                                                 |                                                                                                             |                                                     |             |
| <b>Hematopoietic</b>                            |                                                                                                                               |                                                                                                             |                                                     |             |
| LIF<br>G-CSF<br>GM-CSF                          |                                                                                                                               | Bersinger 2012<br>Punnonen 1996<br>Oku 2004                                                                 |                                                     |             |
| CSF1/M-CSF                                      | Fukaya 1994<br>Budrys 2012                                                                                                    |                                                                                                             | Weinberg 1991                                       |             |
| SCGF<br>SCF                                     |                                                                                                                               |                                                                                                             |                                                     | Osuga 2000  |
| <b>Tissue Remodeling</b>                        |                                                                                                                               |                                                                                                             |                                                     |             |
| bFGF<br>PDGF-bb<br>VEGF                         | Bourlev 2006<br>McLaren 1996<br>Kupker 1998                                                                                   | Bersinger 2012<br>Overton 1996<br>Kalu 2007<br>Dziunycz 2009                                                |                                                     |             |





171 **Table S8.** Over-representation of transcriptional binding sites among macrophage secreted  
 172 cytokines.  
 173

| Transcription Factor | All Motifs | Consensus Sequence(s)   | Co-expression Profile P-Value |                     | Co-expression Profile FDR |               |        |        |
|----------------------|------------|-------------------------|-------------------------------|---------------------|---------------------------|---------------|--------|--------|
|                      |            |                         | IRIS                          | HICT                | IRIS                      | HICT          |        |        |
| C/EBPbeta            | <0.0001    | V\$CEBPB_01             | 0.0000                        | 0.0000              | 0.1330                    | 0.0645        |        |        |
|                      |            | V\$CEBPB_02             | 0.0022                        | 0.0000              | 0.1448                    | 0.0392        |        |        |
|                      |            | V\$CEBP_Q2_01           | 0.0129                        | 0.1626              | 0.2820                    | 0.4249        |        |        |
|                      |            | V\$CEBP_Q3              | 0.2298                        | 0.3982              | 0.6020                    | 0.7252        |        |        |
|                      |            | V\$CEBPB_Q6             | NA                            | NA                  | NA                        | NA            |        |        |
| RelA-p65-isoform1    | 0.0026     | V\$NFKAPPAB65_01        | 0.0021                        | 0.0000              | <b>0.0749</b>             | <b>0.0078</b> |        |        |
|                      |            | V\$NFKAPPAB_01          | 0.0000                        | 0.0000              | <b>0.0371</b>             | <b>0.0015</b> |        |        |
|                      |            | V\$NFKB_Q6_01           | 0.0000                        | 0.0000              | <b>0.0456</b>             | <b>0.0089</b> |        |        |
|                      |            | V\$RELA_Q6              | NA                            | NA                  | NA                        | NA            |        |        |
| CREB1                | 0.0047     | V\$CREB_01              | 0.9017                        | 0.8568              | 0.9857                    | 1.0000        |        |        |
|                      |            | V\$CREB_Q2              | 0.6960                        | 0.1106              | 0.9826                    | 0.3907        |        |        |
|                      |            | V\$CREB_Q4              | 0.7767                        | 0.8489              | 1.0000                    | 1.0000        |        |        |
|                      |            | V\$CREB_Q2              | 0.0895                        | 0.7080              | 0.4423                    | 1.0000        |        |        |
|                      |            | V\$TAXCREB_01           | 0.8693                        | 0.1147              | 0.9997                    | 0.3401        |        |        |
|                      |            | V\$TAXCREB_Q2           | 0.4063                        | 0.2286              | 0.7197                    | 0.3837        |        |        |
|                      |            | V\$CREB_Q2_01           | 0.6716                        | 0.7511              | 0.9015                    | 0.9338        |        |        |
|                      |            | V\$CREB_Q4_01           | 0.2041                        | 0.3401              | 0.5608                    | 0.6951        |        |        |
|                      |            | V\$CREB_Q3              | 0.2981                        | 0.1549              | 0.7330                    | 0.7430        |        |        |
|                      |            | V\$CREBATF_Q6           | NA                            | NA                  | NA                        | NA            |        |        |
|                      |            | V\$CREB1_01             | NA                            | NA                  | NA                        | NA            |        |        |
|                      |            | V\$CREB1_Q6             | NA                            | NA                  | NA                        | NA            |        |        |
|                      |            | NF-kappaB1-p50:RelA-p65 | 0.0095                        | V\$P50RELAP65_Q5_01 | NA                        | NA            | NA     | NA     |
| ATF-2                | 0.0186     | V\$CREBP1_01            | 0.6869                        | 0.9660              | 0.9999                    | 1.0000        |        |        |
|                      |            | V\$CREBP1CJUN_01        | 0.7810                        | 0.6883              | NA                        | NA            |        |        |
|                      |            | V\$CREBP1_Q2            | 0.8366                        | 0.4664              | 0.9642                    | 0.7473        |        |        |
|                      |            | V\$CREB_Q3              | 0.2981                        | 0.1549              | NA                        | NA            |        |        |
|                      |            | V\$CREBATF_Q6           | NA                            | NA                  | NA                        | NA            |        |        |
| NF-kappaB1-p50       | 0.0198     | V\$ATF2_Q5              | NA                            | NA                  | NA                        | NA            |        |        |
|                      |            | V\$NFKAPPAB50_01        | NA                            | NA                  | NA                        | NA            |        |        |
|                      |            | V\$NFKAPPAB_01          | 0.0000                        | 0.0000              | <b>0.0371</b>             | <b>0.0015</b> |        |        |
|                      |            | V\$NFKB_Q6              | 0.0000                        | 0.0000              | <b>0.0300</b>             | <b>0.0064</b> |        |        |
|                      |            | V\$NFKB_C               | 0.0022                        | 0.0000              | <b>0.0982</b>             | <b>0.0128</b> |        |        |
| c-Fos:c-Jun          | 0.0274     | V\$NFKB_Q6_01           | 0.0000                        | 0.0000              | <b>0.0456</b>             | <b>0.0089</b> |        |        |
|                      |            | V\$P50_Q6               | NA                            | NA                  | NA                        | NA            |        |        |
|                      |            | V\$CFOSCJUN_Q5          | NA                            | NA                  | NA                        | NA            |        |        |
|                      |            | c-Ets-1                 | 0.0286                        | V\$CETS1P54_01      | 0.2140                    | 0.7336        | 0.6859 | 0.9423 |
|                      |            | V\$CETS1P54_02          | NA                            | NA                  | NA                        | NA            |        |        |
| AP-1                 | 0.0417     | V\$ETS1_B               | 0.0712                        | 0.0319              | 0.4129                    | 0.3434        |        |        |
|                      |            | V\$ETS_B                | NA                            | NA                  | NA                        | NA            |        |        |
|                      |            | V\$ETS_Q6               | NA                            | NA                  | NA                        | NA            |        |        |
|                      |            | V\$ETS_Q4               | 0.0000                        | 0.0000              | <b>0.0035</b>             | <b>0.0131</b> |        |        |
|                      |            | V\$CETS1P54_03          | NA                            | NA                  | NA                        | NA            |        |        |
|                      |            | V\$CETS1_Q6             | NA                            | NA                  | NA                        | NA            |        |        |
|                      |            | V\$CETS1_02             | NA                            | NA                  | NA                        | NA            |        |        |
|                      |            | V\$ETS1_02              | NA                            | NA                  | NA                        | NA            |        |        |
|                      |            | V\$AP1FJ_Q2             | 0.0044                        | 0.0000              | 0.1437                    | 0.1090        |        |        |
|                      |            | V\$AP1_Q2               | 0.0713                        | 0.0050              | 0.3912                    | 0.1115        |        |        |
| STAT1                | 0.0444     | V\$AP1_Q6               | 0.0000                        | 0.0041              | 0.0835                    | 0.1088        |        |        |
|                      |            | V\$AP1_Q4               | 0.0000                        | 0.0000              | 0.1027                    | 0.1030        |        |        |
|                      |            | V\$AP1_C                | 0.0000                        | 0.4241              | 0.1214                    | 0.7488        |        |        |
|                      |            | V\$AP1_01               | 0.0000                        | 0.0000              | <b>0.0159</b>             | <b>0.0796</b> |        |        |
|                      |            | V\$AP1_Q2_01            | 0.0109                        | 0.0807              | 0.2366                    | 0.3499        |        |        |
|                      |            | V\$AP1_Q6_01            | 0.0066                        | 0.0449              | 0.1453                    | 0.2619        |        |        |
|                      |            | V\$AP1_Q4_01            | 0.0000                        | 0.0000              | <b>0.0488</b>             | <b>0.0730</b> |        |        |
|                      |            | V\$AP1_Q6_02            | NA                            | NA                  | NA                        | NA            |        |        |
|                      |            | V\$STAT1_01             | 0.3418                        | 0.4359              | 0.7391                    | 1.0000        |        |        |
|                      |            | V\$STAT_01              | 0.0146                        | 0.0000              | 0.1433                    | 0.0385        |        |        |
| STAT1                | 0.0444     | V\$STAT1_02             | 0.5580                        | 0.1652              | 0.8404                    | 0.4480        |        |        |
|                      |            | V\$STAT1_03             | 0.8896                        | 0.7739              | 0.9931                    | 1.0000        |        |        |
|                      |            | V\$STAT_Q6              | 0.6152                        | 0.8502              | 0.8555                    | 0.9888        |        |        |
|                      |            | V\$STAT1_05             | NA                            | NA                  | NA                        | NA            |        |        |
|                      |            | V\$STAT1_Q6             | NA                            | NA                  | NA                        | NA            |        |        |

174  
 175 NA – Not Annotated in MSigDB v4.0  
 176

176 **Table S9.** Luminex Targets and Assay Performance Characteristics

177

| Panel              | Analyte     | HUGO Gene Symbol | xMAP Region | LoD, pg/mL | Intra-Assay CV, % | Inter-Assay CV, % |
|--------------------|-------------|------------------|-------------|------------|-------------------|-------------------|
| Group I - 27-plex  | IL-1b       | IL1B             | 39          | 0.02       | 0.7               | 2.5               |
|                    | IL-1ra      | IL1RA            | 25          | 1.28       | 0.9               | 5.7               |
|                    | IL-2        | IL2              | 38          | 0.34       | 0.8               | 3.6               |
|                    | IL-4        | IL4              | 52          | 0.02       | 2                 | 3.5               |
|                    | IL-5        | IL5              | 33          | 0.03       | 1.7               | 4.5               |
|                    | IL-6        | IL6              | 19          | 0.13       | 0.7               | 3.2               |
|                    | IL-7        | IL7              | 74          | 0.07       | 1.4               | 3.2               |
|                    | IL-8        | IL8              | 54          | 0.06       | 2.4               | 2.9               |
|                    | IL-9        | IL9              | 77          | 0.83       | 1                 | 4.3               |
|                    | IL-10       | IL10             | 56          | 0.12       | 0.4               | 6.4               |
|                    | IL-12 (p70) | IL12A,B          | 75          | 3.10       | 2.2               | 1.8               |
|                    | IL-13       | IL13             | 51          | 0.05       | 1.2               | 4.4               |
|                    | IL-15       | IL15             | 73          | 0.62       | 0.4               | 4.5               |
|                    | IL-17       | IL17             | 76          | 0.59       | 0.8               | 7.5               |
|                    | Eotaxin     | CCL11            | 43          | 0.52       | 1.2               | 8                 |
|                    | bFGF        | FGFB             | 44          | 0.47       | 0.7               | 6.1               |
|                    | G-CSF       | CSF3             | 57          | 0.21       | 1.5               | 3.7               |
|                    | GM-CSF      | CSF2             | 34          | 0.65       | 0.4               | 3.4               |
|                    | IFNg        | IFNG             | 21          | 0.52       | 1.3               | 2.9               |
|                    | IP-10       | CXCL10           | 48          | 0.63       | 1.1               | 3.8               |
|                    | MCP-1       | CCL2             | 53          | 0.23       | 0.5               | 4                 |
|                    | MIP-1a      | CCL3             | 55          | 0.22       | 0.6               | 5.3               |
|                    | MIP-1b      | CCL4             | 18          | 0.21       | 0.5               | 2.5               |
|                    | PDGF        | PDGF             | 47          | 0.45       | 2                 | 3.8               |
|                    | RANTES      | CCL5             | 37          | 0.46       | 1                 | 6.5               |
|                    | TNFa        | TNF              | 36          | 1.55       | 1.4               | 3.6               |
|                    | VEGF        | VEGF             | 45          | 0.47       | 1.1               | 4.1               |
| Group II - 21-plex | IFNa2       | IFNA2            | 20          | 0.93       | 1.7               | 9                 |
|                    | IL-1a       | IL1A             | 63          | 0.13       | 1.1               | 3.3               |
|                    | IL-2ra      | IL2RA            | 13          | 0.70       | 1.1               | 11.1              |
|                    | IL-3        | IL3              | 64          | 1.64       | 0.9               | 6.4               |
|                    | IL-12 (p40) | IL12B            | 28          | 0.40       | 1.4               | 7.6               |
|                    | IL-16       | IL16             | 27          | 0.51       | 1.3               | 6.8               |
|                    | IL-18       | IL18             | 42          | 0.09       | 6                 | 8.6               |
|                    | CTACK       | CCL27            | 72          | 1.10       | 2.5               | 6.1               |
|                    | GRO-a       | CXCL1            | 61          | 1.87       | 1                 | 5.6               |
|                    | HGF         | HGF              | 62          | 0.74       | 0.9               | 6                 |
|                    | LIF         | LIF              | 29          | 0.54       | 0.9               | 2.9               |
|                    | MCP-3       | CCL7             | 26          | 0.31       | 1.5               | 10.9              |
|                    | M-CSF       | CSF1             | 67          | 0.53       | 1                 | 4.8               |
|                    | MIF         | MIF              | 35          | 1.38       | 4.6               | 7.9               |
|                    | MIG         | CXCL9            | 14          | 1.50       | 1.3               | 9.7               |
|                    | b-NGF       | NGFB             | 46          | 0.21       | 0.9               | 5                 |
|                    | SCF         | SCF              | 65          | 0.38       | 1.3               | 3.8               |
|                    | SCGF-b      | CLEC11A          | 78          | 5.72       | 1.5               | 5.8               |
|                    | SDF-1a      | CXCL12           | 22          | 1.19       | 1.3               | 12.3              |
|                    | TNFb        | TNFB             | 30          | 0.51       | 0.4               | 3.8               |
| TRAIL              | TNFSF10     | 66               | 0.79        | 1.5        | 6.3               |                   |
| ICAM-1 singleplex  | ICAM-1      | ICAM1            | 12          | 0.95       | 1.3               | 5.4               |
| VCAM-1 singleplex  | VCAM-1      | VCAM1            | 15          | 0.70       | 1.8               | 9.4               |

178 **Table S10.** Leukocyte Sub-populations Among Peritoneal Aspirates  
 179

| Population            | Surface Staining  | Peripheral Blood <sup>1</sup> | Total              | Peritoneal Aspirate |              |
|-----------------------|-------------------|-------------------------------|--------------------|---------------------|--------------|
|                       |                   |                               |                    | Adherent            | Non-adherent |
| Leukocytes            | CD45+             | 85%                           | 98                 | 98                  | 98           |
| Granulocytes          | CD14+ CD68- CD10+ | 59 ± 20                       | <1                 | <1                  | <1           |
| Monocytes/Macrophages | CD14+ CD68+ CD10- | 6 ± 2                         | 64 ± 7<br>74 ± 8** | 96 ± 7              | 41 ± 6       |
| Lymphocytes           | CD14- CD68- CD10- | 34 ± 8                        | 20 ± 6             | <5                  | 60 ± 13      |

180  
 181 Values are mean ± s.d. percent composition of three donors.  
 182 <sup>1</sup>Peripheral blood values are reference ranges for healthy adults (Reichert et al. 1991, Bain  
 183 1996)  
 184



184  
185

**Table S11. Kinase Inhibitor Treatments**

| Inhibitor       | Primary Target(s)    | IC50 (nM)   | Experimental Dose (uM) |
|-----------------|----------------------|-------------|------------------------|
| LY294002        | PI3K $\beta$         | 310         | 10                     |
|                 | PI3K $\alpha$        | 730         |                        |
|                 | PI3K $\delta$        | 1,060       |                        |
|                 | PI3K $\gamma$        | 6,600       |                        |
| PD98059         | MEK1                 | 4,000       | 50                     |
|                 | MEK2                 | 50,000      |                        |
| SB203580        | p38 $\alpha$ /MAPK14 | 50          | 10                     |
|                 | p38 $\beta$ /MAPK11  | 500         |                        |
| SP600125        | JNK1                 | 40          | 10                     |
|                 | JNK2                 | 40          |                        |
|                 | JNK3                 | 90          |                        |
| BMS-345541      | IKK2                 | 300         | 10                     |
|                 | IKK1                 | 4,000       |                        |
| SU6656          | SRC                  | 280         | 10                     |
|                 | Fyn                  | 170         |                        |
|                 | Yes                  | 20          |                        |
|                 | Lyn                  | 130         |                        |
| JAK Inhibitor I | JAK1                 | 15 (murine) | 10                     |
|                 | JAK2                 | 1           |                        |
|                 | JAK3                 | 5 (Ki50)    |                        |
|                 | Tyk2                 | 1           |                        |
| Gö6983          | PKC $\alpha$         | 7           | 10                     |
|                 | PKC $\beta$          | 7           |                        |
|                 | PKC $\gamma$         | 6           |                        |
|                 | PKC $\delta$         | 10          |                        |
|                 | PKC $\zeta$          | 60          |                        |

186
